# Supplementary material for: Chemical Constituents of the Deep-Sea-Derived Penicillium citrinum W17 and Their Anti-Inflammatory and Anti-Osteoporotic Bioactivities
Source: Preprints.org preprint supplement (doi:10.20944/preprints202309.1663.v1), 2023-09-25
Supplement: Supplementary file 1 [file supplementary]

# Supporting Information

## Chemical Constituents of the Deep-Sea-Derived *Penicillium citrinum* W17 and Their Anti-Inflammatory and Anti-osteoporotic Bioactivities

Yong Zhang <sup>1,†</sup>, Chun-Lan Xie <sup>1,2,†</sup>, Yuan Wang <sup>1</sup>, Xi-Wen He <sup>1</sup>, Ming-Min Xie <sup>1</sup>, You Li <sup>1</sup>, Kai Zhang <sup>1</sup>, Zheng-Biao Zou <sup>1</sup>, Long-He Yang <sup>1,\*</sup>, Ren Xu <sup>2,\*</sup>, and Xian-Wen Yang <sup>1,\*</sup>

<sup>1</sup> Key Laboratory of Marine Genetic Resources, Technical Innovation Center for Utilization of Marine Biological Resources, Third Institute of Oceanography, Ministry of Natural Resources, 184 Daxue Road, Xiamen 361005, China

<sup>2</sup> School of Medicine, Xiamen University, South Xiang'an Road, Xiamen 361005, China

\* Correspondence: yangxianwen@tio.org.cn (X.-W.Y.); xuren526@xmu.edu.cn (R.X.); longheyang@tio.org.cn (L.Y.); Tel.: +86-592-219-5319 (X.-W.Y.); +86-592-288-0577 (R.X.); +86-592-219-5319 (L.Y.)

<sup>†</sup> These authors contributed equally to this work.

### Content

**Figure S1.** The HR-ESI-MS of compound **1**.

**Figure S2.** The <sup>1</sup>H NMR spectrum of compound **1** in CD<sub>3</sub>OD.

**Figure S3.** The <sup>13</sup>C NMR spectrum of compound **1** in CD<sub>3</sub>OD.

**Figure S4.** The HSQC spectrum of compound **1** in CD<sub>3</sub>OD.

**Figure S5.** The <sup>1</sup>H-<sup>1</sup>H COSY spectrum of compound **1** in CD<sub>3</sub>OD.

**Figure S6.** The HMBC spectrum of compound **1** in CD<sub>3</sub>OD.

**Figure S7.** The NOESY spectrum of compound **1** in CD<sub>3</sub>OD.

**Figure S8.** The HR-ESI-MS of compound **2**.

**Figure S9.** The <sup>1</sup>H NMR spectrum of compound **2** in DMSO-*d*<sub>6</sub>.

**Figure S10.** The <sup>13</sup>C NMR spectrum of compound **2** in DMSO-*d*<sub>6</sub>.

**Figure S11.** The HSQC spectrum of compound **2** in DMSO-*d*<sub>6</sub>.

**Figure S12.** The <sup>1</sup>H-<sup>1</sup>H COSY spectrum of compound **2** in DMSO-*d*<sub>6</sub>.

**Figure S13.** The HMBC spectrum of compound **2** in DMSO-*d*<sub>6</sub>.

**Figure S14.** The NOESY spectrum of compound **2** in DMSO-*d*<sub>6</sub>.

**Figure S15.** The HR-ESI-MS of compound **3**.

**Figure S16.** The <sup>1</sup>H NMR spectrum of compound **3** in DMSO-*d*<sub>6</sub>.

**Figure S17.** The <sup>13</sup>C NMR spectrum of compound **3** in DMSO-*d*<sub>6</sub>.

**Figure S18.** The HSQC spectrum of compound **3** in DMSO-*d*<sub>6</sub>.

**Figure S19.** The <sup>1</sup>H-<sup>1</sup>H COSY spectrum of compound **3** in DMSO-*d*<sub>6</sub>.

**Figure S20.** The HMBC spectrum of compound **3** in DMSO-*d*<sub>6</sub>.

**Figure S21.** The NOESY spectrum of compound **3** in DMSO-*d*

## Elemental Composition Report

Page 1

Tolerance = 5.0 mDa / DBE: min = -1.5, max = 50.0

Element prediction: Off

Number of isotope peaks used for i-FIT = 3

Monoisotopic Mass, Even Electron Ions

105 formula(e) evaluated with 3 results within limits (up to 50 best isotopic matches for each mass)

Elements Used:

C: 0-35 H: 0-50 O: 0-15 <sup>23</sup>Na: 0-1

ZYA 5-2-N 86 (0.347) Cm (75:109)

1: TOF MS ES-

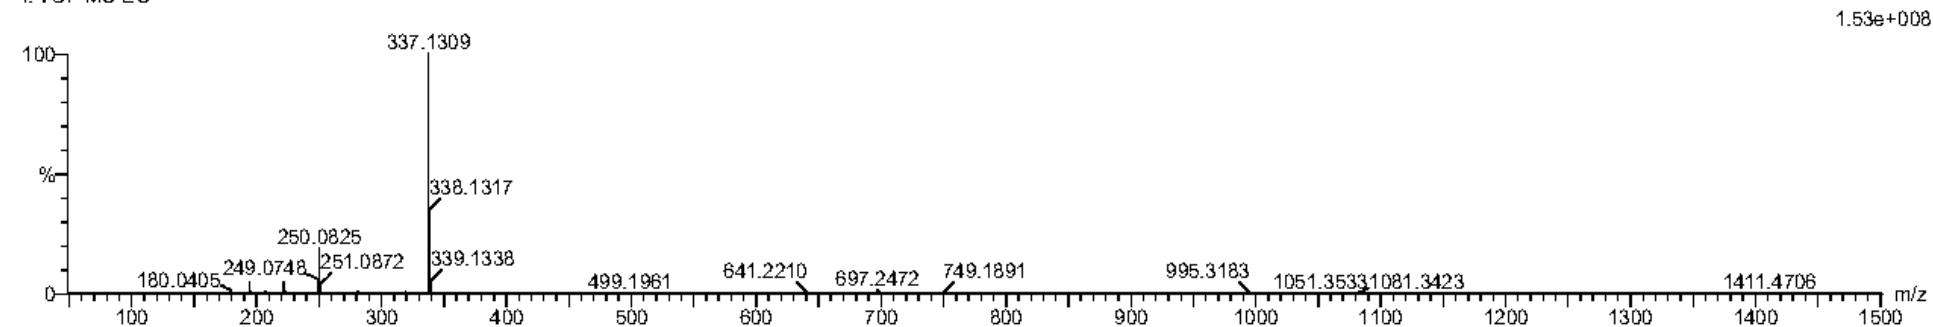

Minimum: 80.00  
Maximum: 100.00

| Mass     | RA     | Calc. Mass | mDa  | PPM   | DBE  | i-FIT  | Norm  | Conf (%) | Formula                     |
|----------|--------|------------|------|-------|------|--------|-------|----------|-----------------------------|
| 337.1309 | 100.00 | 337.1287   | 2.2  | 6.5   | 7.5  | 2059.9 | 0.584 | 55.77    | C17 H21 O7                  |
|          |        | 337.1263   | 4.6  | 13.6  | 4.5  | 2060.5 | 1.170 | 31.05    | C15 H22 O7 <sup>23</sup> Na |
|          |        | 337.1346   | -3.7 | -11.0 | -1.5 | 2061.3 | 2.026 | 13.18    | C10 H25 O12                 |

**Figure S1.** The HR-ESI-MS of compound **1**.

ZYA 5-2 M 5.7mg H

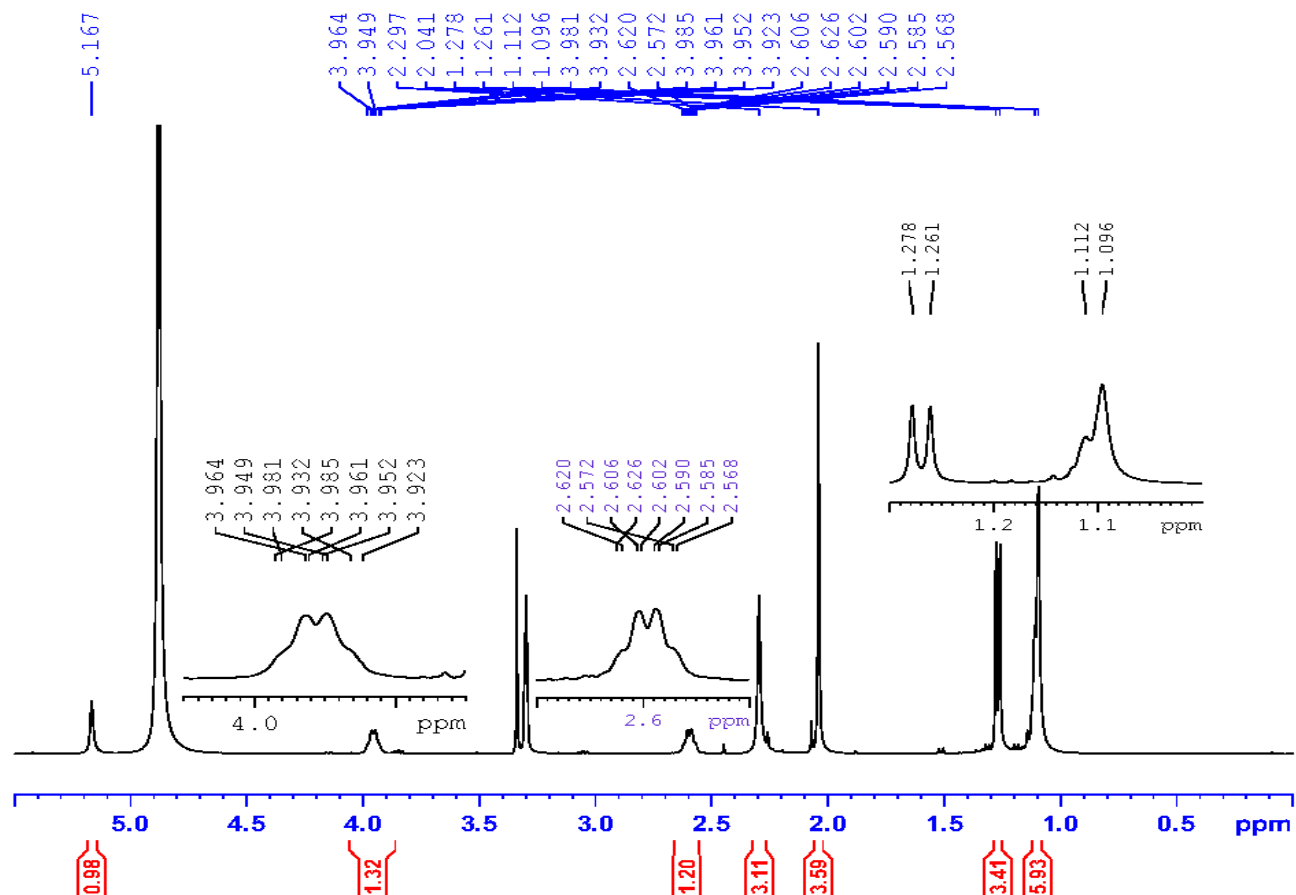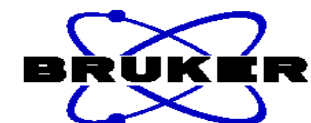

NAME ZYA 5-2 M 5.7mg  
EXPNO 1  
PROCNO 1  
Date\_ 20220109  
Time\_ 15.40  
INSTRUM spect  
PROBHD 5 mm PABBO BB-  
PULPROG zg30  
TD 65536  
SOLVENT MeOD  
NS 16  
DS 2  
SWH 8012.820 Hz  
FIDRES 0.122266 Hz  
AQ 4.0894966 sec  
RG 203  
DW 62.400 usec  
DE 6.50 usec  
TE 295.3 K  
D1 1.00000000 sec  
TD0 1

----- CHANNEL f1 -----  
SF01 400.1324710 MHz  
NUC1 1H  
P1 13.90 usec  
SI 65536  
SF 400.1300115 MHz  
WDW EM  
SSB 0  
LB 0.30 Hz  
GB 0  
PC 1.00

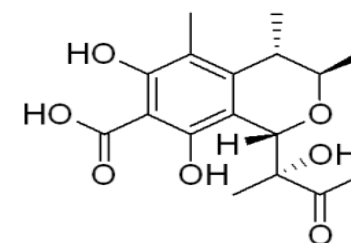

Figure S2. The  $^1\text{H}$  NMR spectrum of compound **1** in  $\text{CD}_3\text{OD}$ .

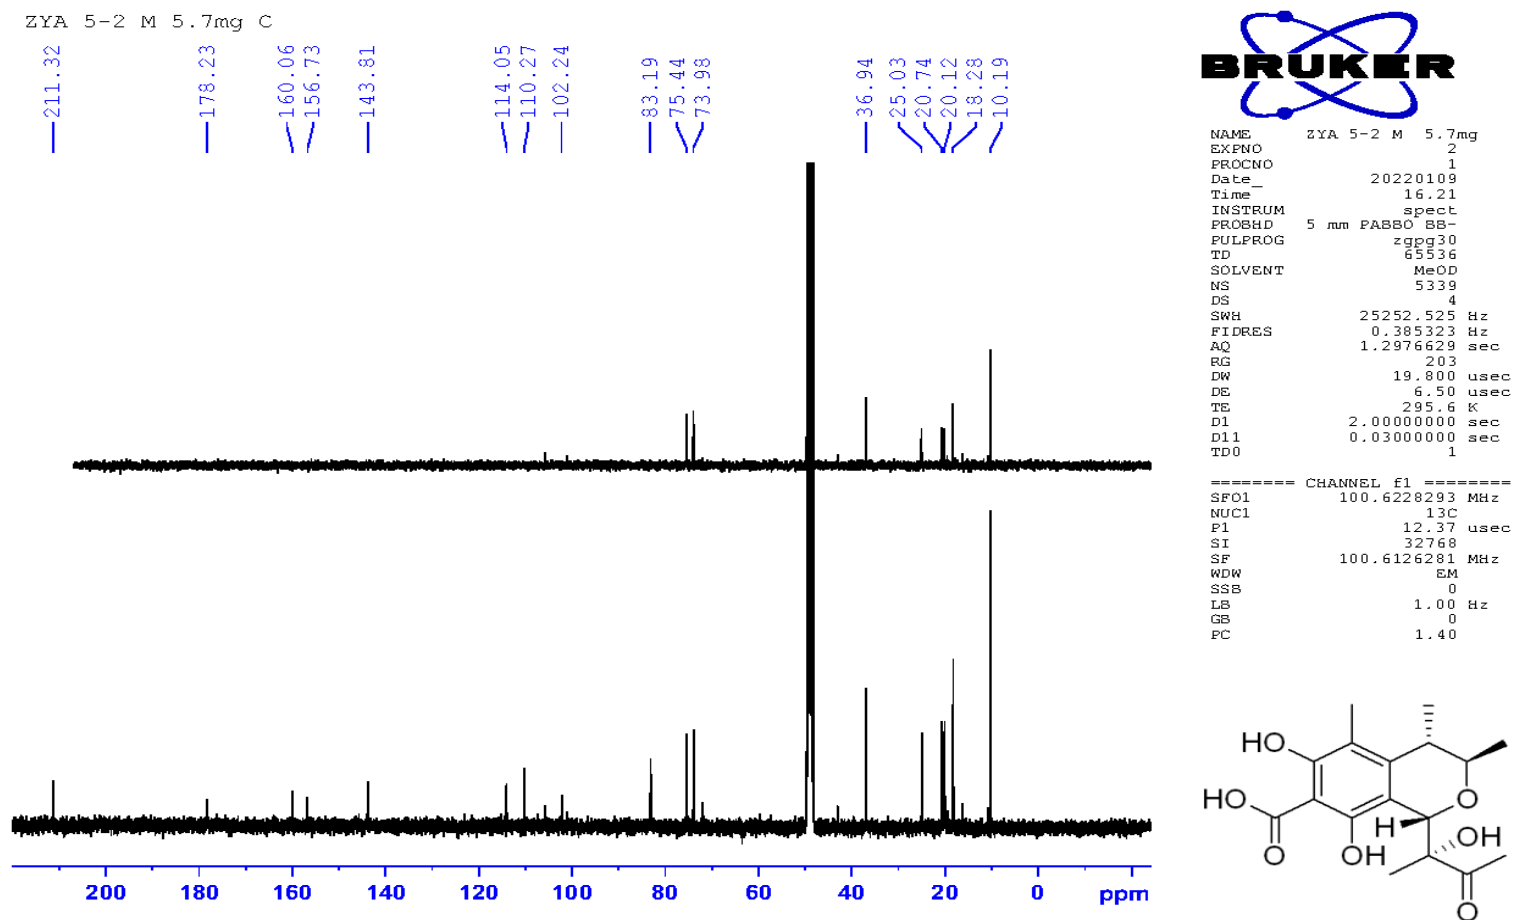

**Figure S3.** The  $^{13}\text{C}$  NMR spectrum of compound **1** in  $\text{CD}_3\text{OD}$ .

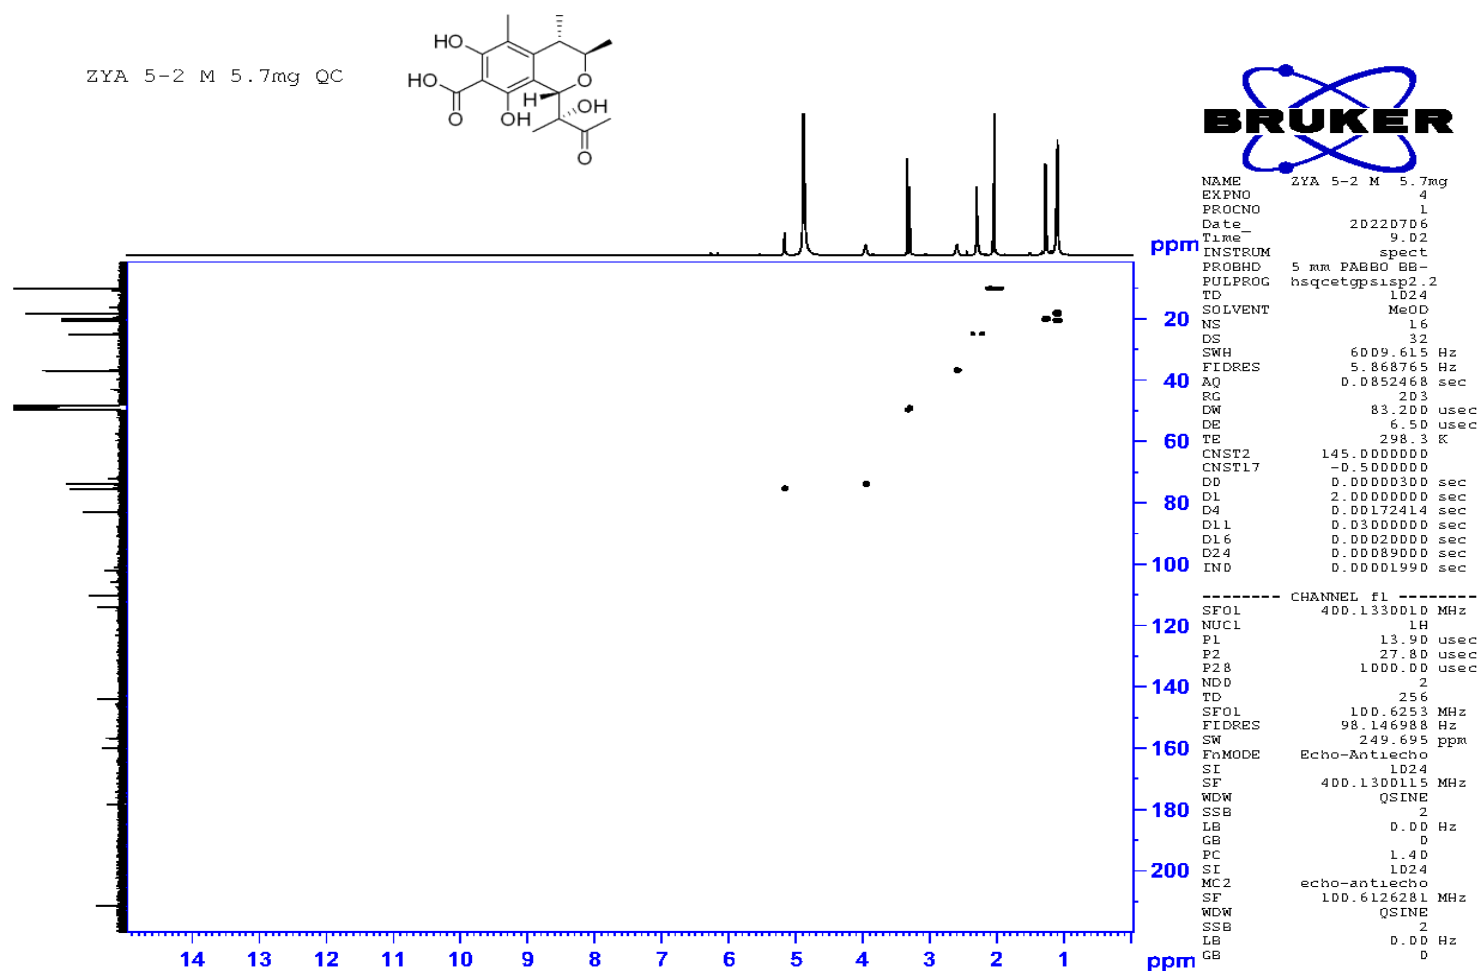

**Figure S4.** The HSQC spectrum of compound **1** in CD<sub>3</sub>OD.

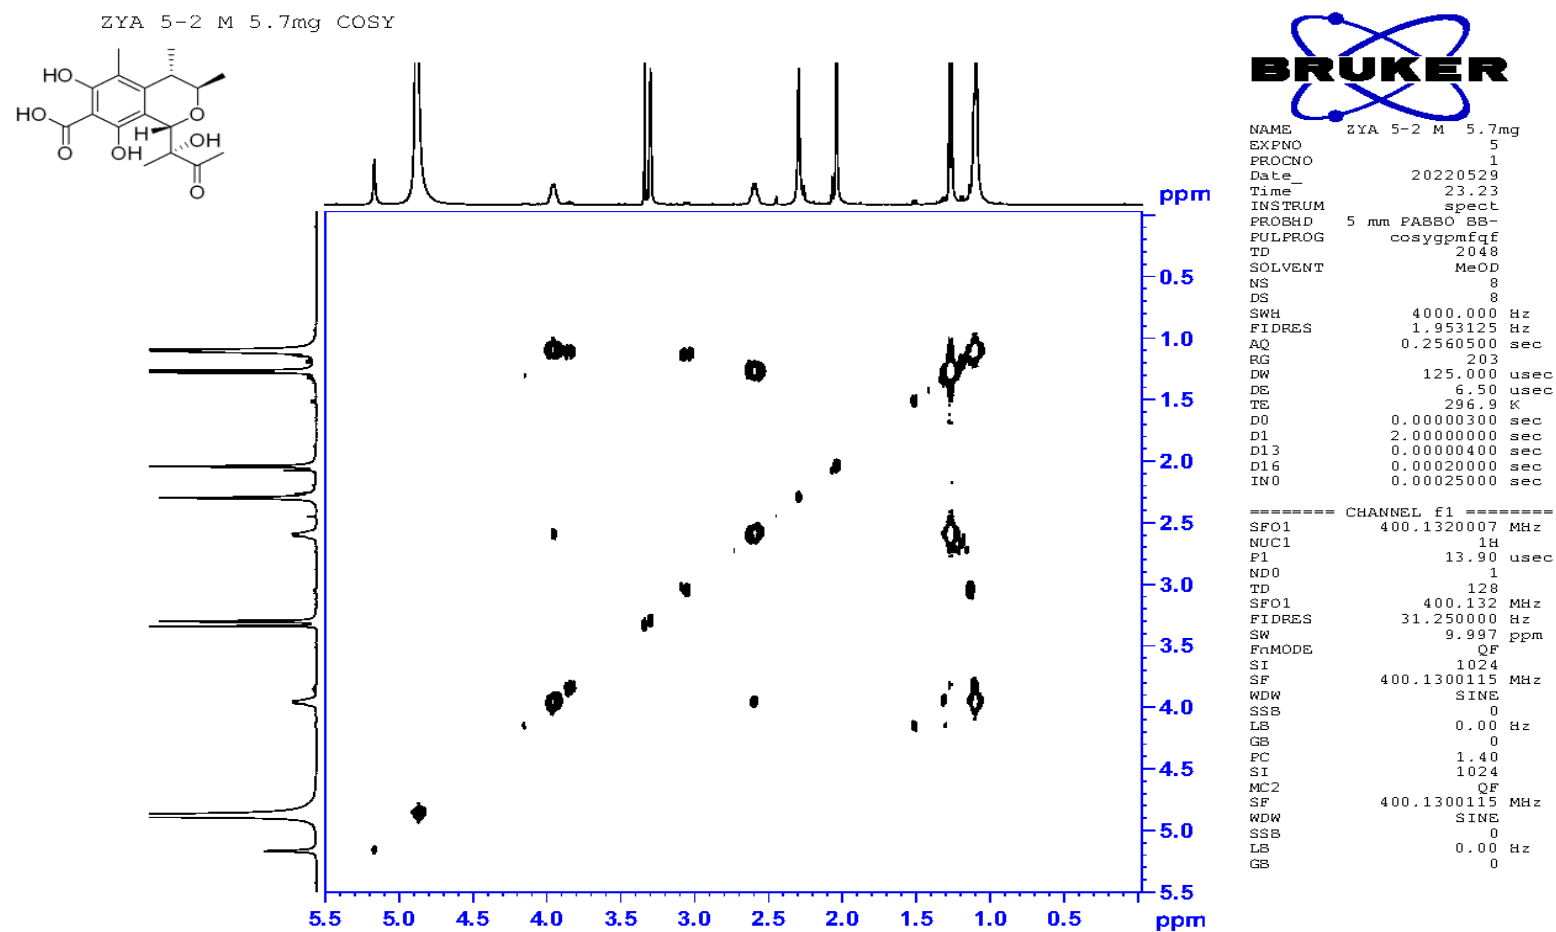

**Figure S5.** The  $^1\text{H}$ - $^1\text{H}$  COSY spectrum of compound **1** in  $\text{CD}_3\text{OD}$ .

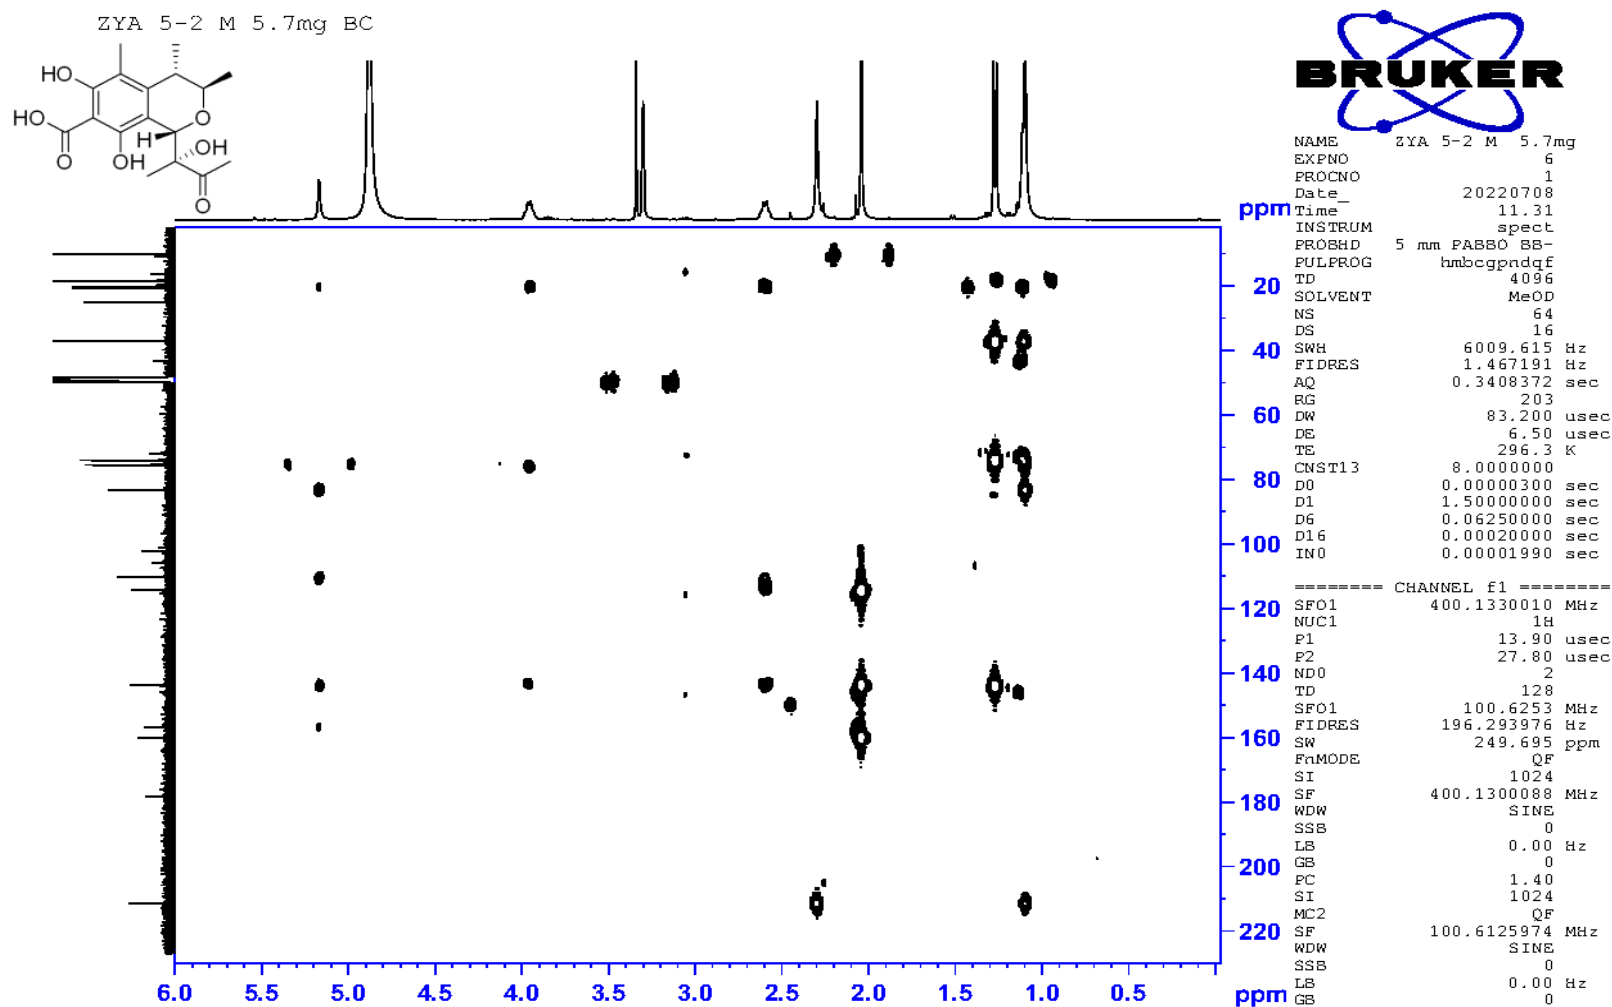

**Figure S6.** The HMBC spectrum of compound **1** in CD<sub>3</sub>OD.

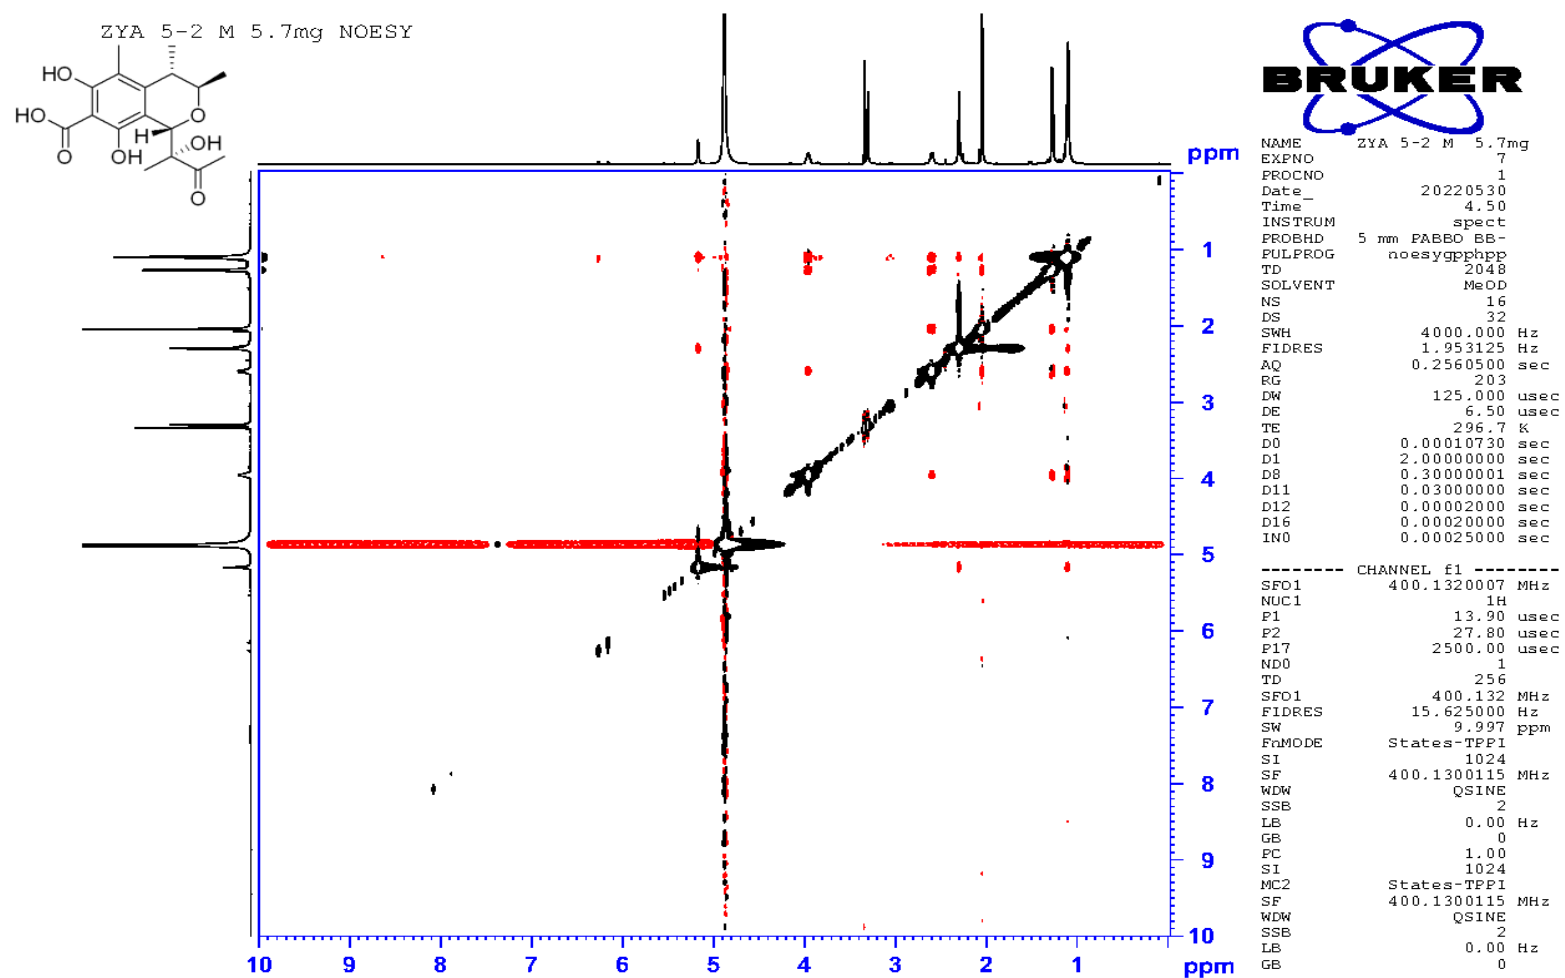

**Figure S7.** The NOESY spectrum of compound **1** in CD<sub>3</sub>OD.

## Elemental Composition Report

Page 1

### Single Mass Analysis

Tolerance = 5.0 mDa / DBE: min = -1.5, max = 50.0

Element prediction: Off

Number of isotope peaks used for i-FIT = 3

Monoisotopic Mass, Even Electron Ions

93 formula(e) evaluated with 2 results within limits (up to 50 best isotopic matches for each mass)

Elements Used:

C: 0-17 H: 0-50 O: 0-15 Na: 0-2

ZYA 8-3 70 (0.290) Cm (69.76)

1: TOF MS ES+

1.23e+006

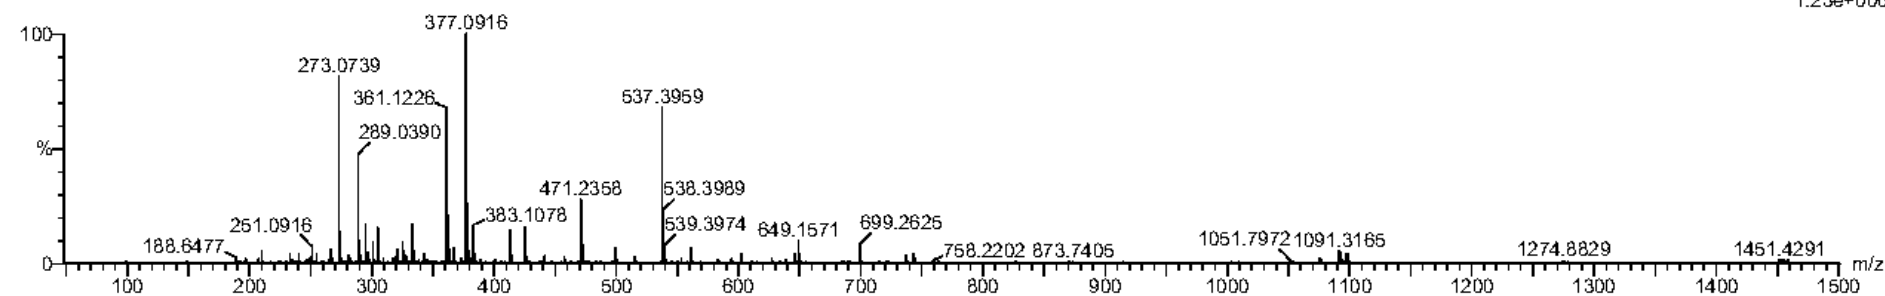

Minimum: -1.5  
Maximum: 5.0 10.0 50.0

| Mass     | Calc. Mass | mDa  | PPM   | DBE | i-FIT  | Norm  | Conf(%) | Formula        |
|----------|------------|------|-------|-----|--------|-------|---------|----------------|
| 361.1226 | 361.1263   | -3.7 | -10.2 | 6.5 | 1484.8 | 0.581 | 55.91   | C17 H22 O7 Na  |
|          | 361.1239   | -1.3 | -3.6  | 3.5 | 1485.0 | 0.819 | 44.09   | C15 H23 O7 Na2 |

Figure S8. The HR-ESI-MS of compound 2.

ZYA 8-3 DMSO 1.0mg H

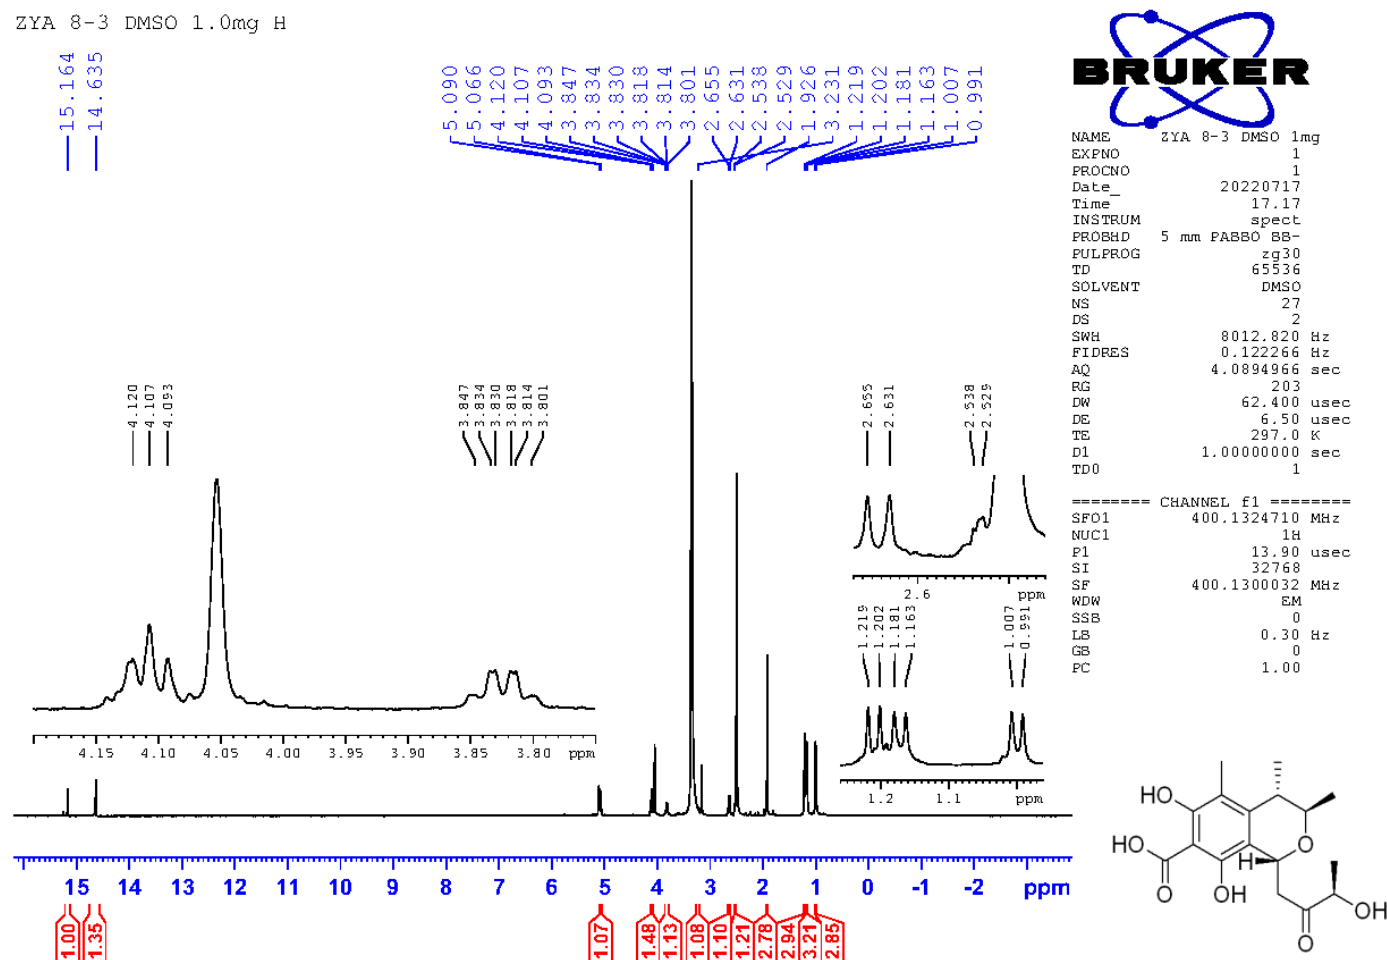

**Figure S9.** The  $^1\text{H}$  NMR spectrum of compound **2** in  $\text{DMSO}-d_6$ .

ZYA 8-3 DMSO 1.0mg C

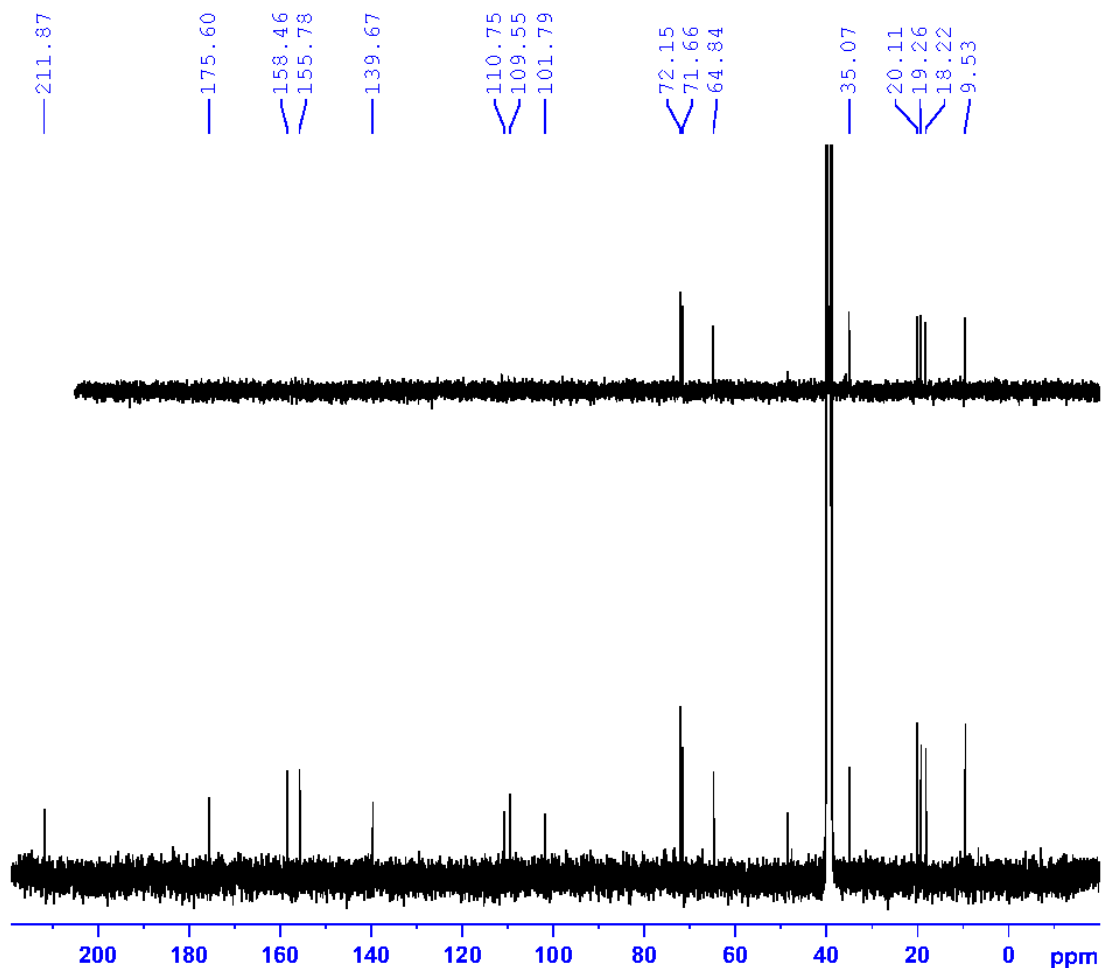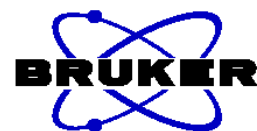

NAME ZYA 8-3 DMSO 1mg  
 EXPNO 2  
 PROCNO 1  
 Date\_ 20220810  
 Time\_ 21.43  
 INSTRUM spect  
 PROBHD 5 mm PABBO BB-  
 PULPROG zgpg30  
 TD 65536  
 SOLVENT DMSO  
 NS 10240  
 DS 4  
 SWH 24038.461 Hz  
 FIDRES 0.366798 Hz  
 AQ 1.3631988 sec  
 RG 203  
 DW 20.800 usec  
 DE 6.50 usec  
 TE 297.3 K  
 D1 2.00000000 sec  
 D11 0.03000000 sec  
 TD0 1

===== CHANNEL f1 =====  
 SFO1 100.6228298 MHz  
 NUC1 13C  
 P1 12.37 usec  
 SI 32768  
 SF 100.6128152 MHz  
 WDW EM  
 SSB 0  
 LB 1.00 Hz  
 GB 0  
 PC 1.40

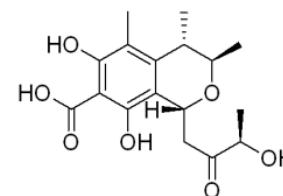

Figure S10. The  $^{13}\text{C}$  NMR spectrum of compound **2** in  $\text{DMSO-}d_6$ .

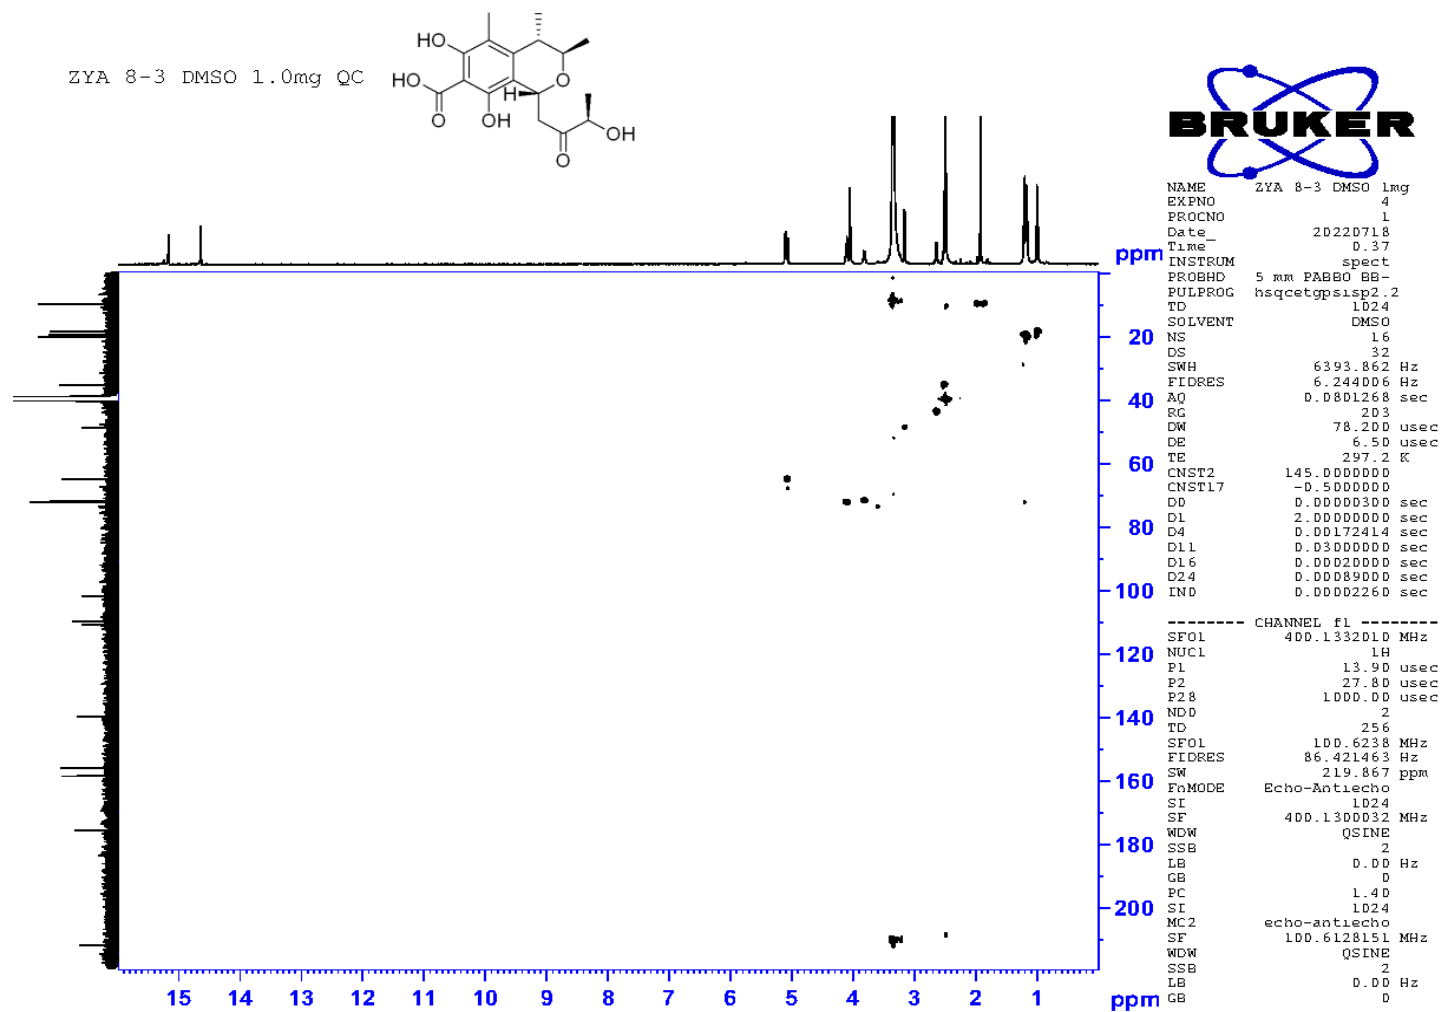

Figure S11. The HSQC spectrum of compound **2** in DMSO-*d*<sub>6</sub>.

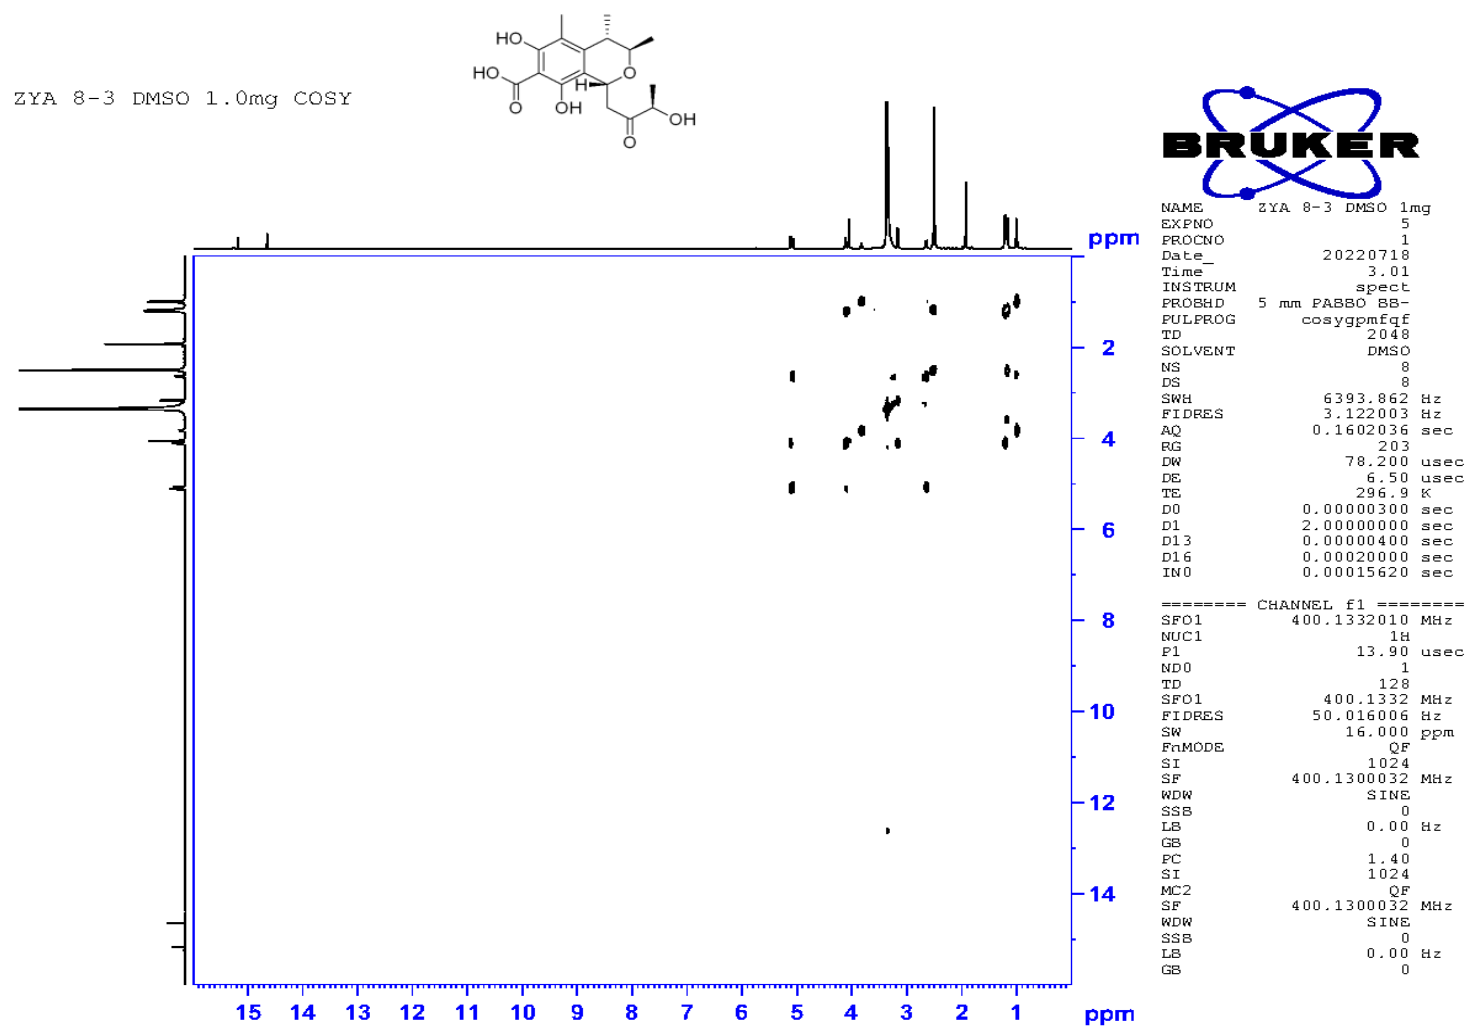

**Figure S12.** The  $^1\text{H}$ - $^1\text{H}$  COSY spectrum of compound **2** in  $\text{DMSO-}d_6$ .

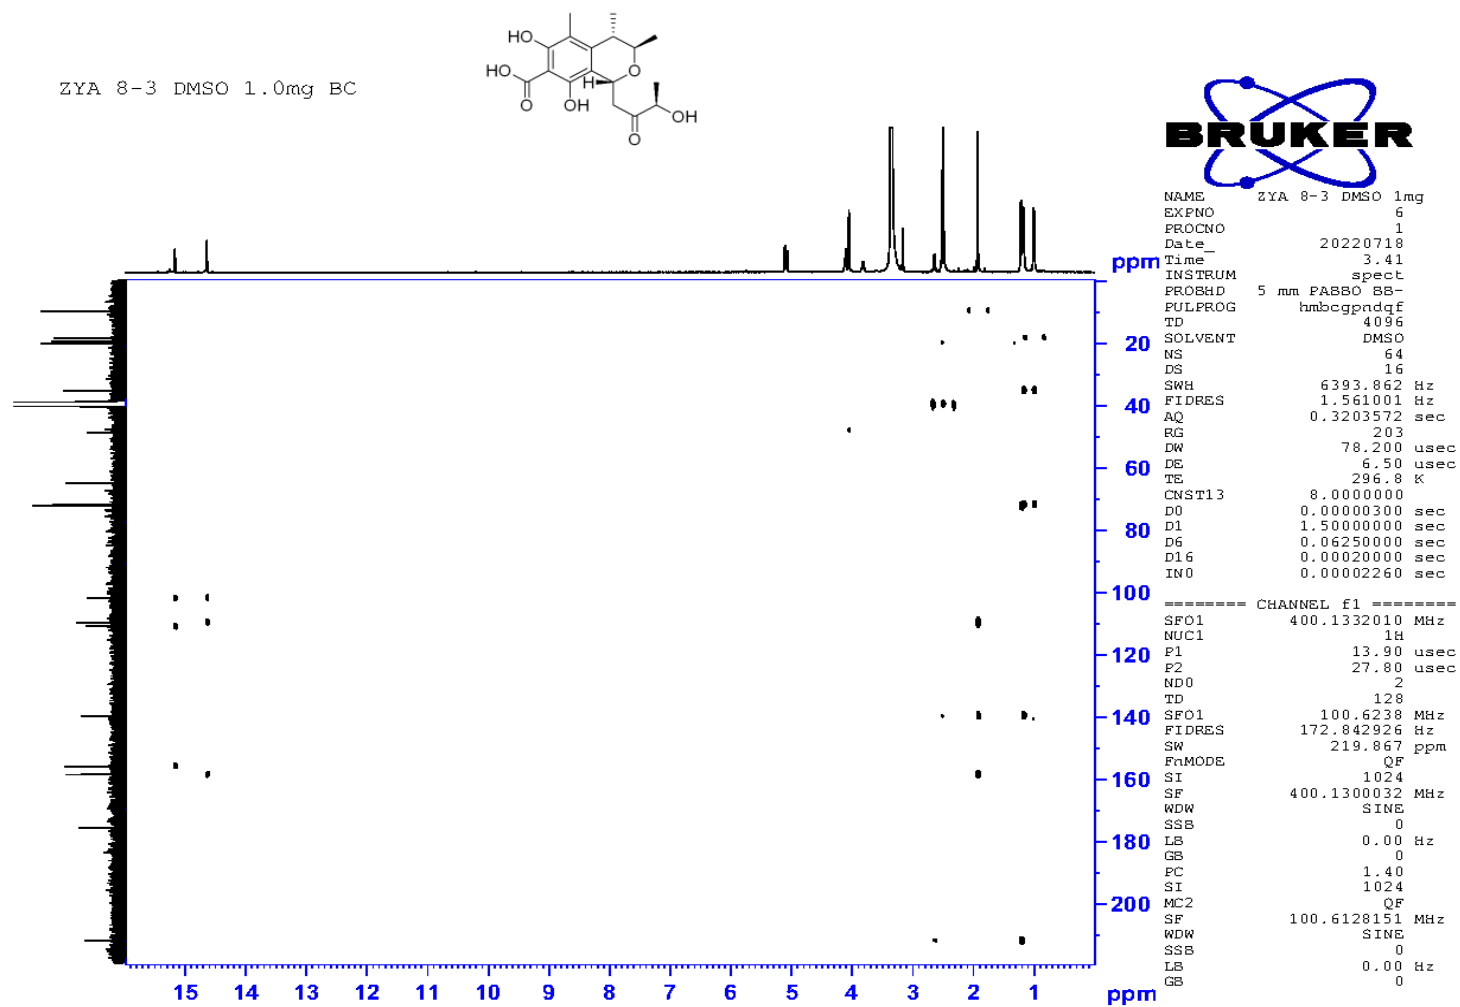

**Figure S13.** The HMBC spectrum of compound **2** in DMSO- $d_6$ .

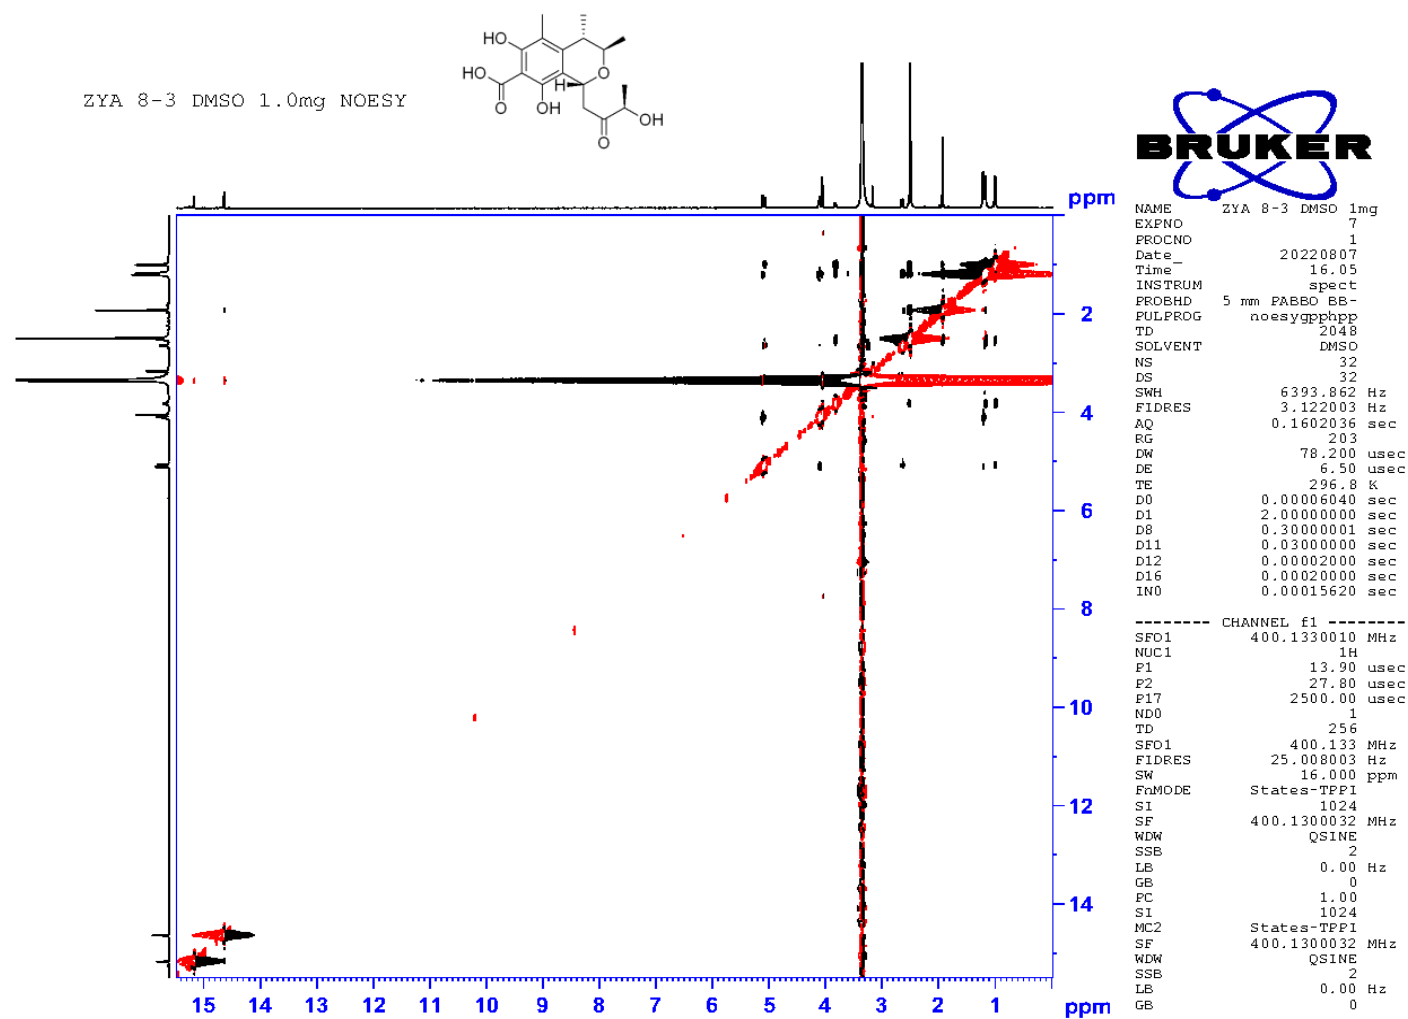

**Figure S14.** The NOESY spectrum of compound **2** in DMSO- $d_6$ .

## Elemental Composition Report

Page 1

Tolerance = 5.0 mDa / DBE: min = -1.5, max = 50.0

Element prediction: Off

Number of isotope peaks used for i-FIT = 3

Monoisotopic Mass, Even Electron Ions

105 formula(e) evaluated with 2 results within limits (up to 50 best isotopic matches for each mass)

Elements Used:

C: 0-35 H: 0-50 O: 0-15 <sup>23</sup>Na: 0-1

ZYA 8-4-N 70 (0.290) Cm (63:89)

1: TOF MS ES-

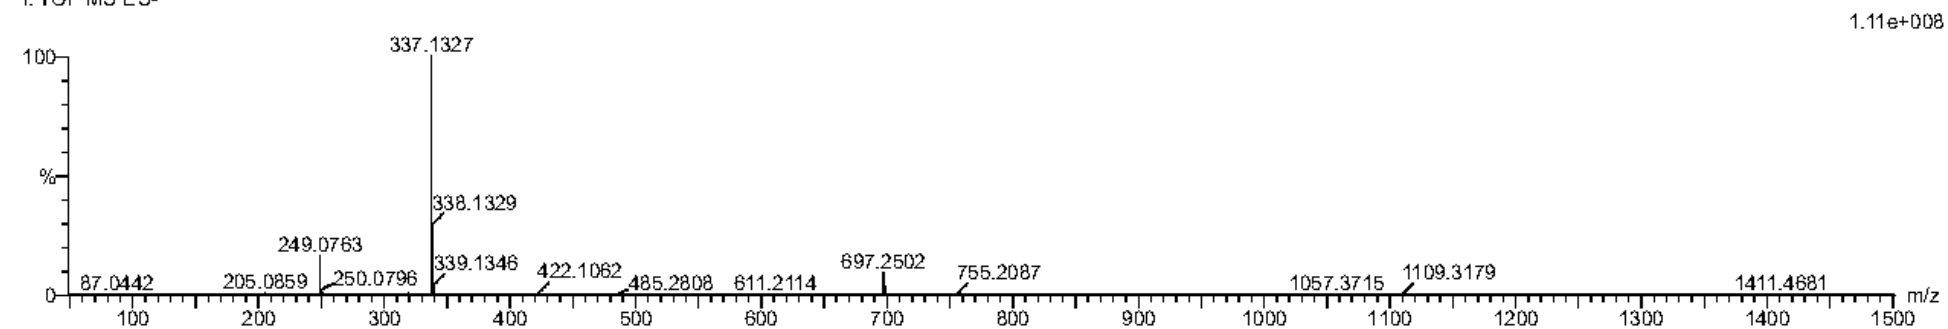

Minimum: 80.00  
Maximum: 100.00

| Mass     | RA     | Calc. Mass | mDa  | PPM  | DBE  | i-FIT  | Norm  | Conf (%) | Formula     |
|----------|--------|------------|------|------|------|--------|-------|----------|-------------|
| 337.1327 | 100.00 | 337.1287   | 4.0  | 11.9 | 7.5  | 2032.0 | 0.148 | 86.21    | C17 H21 O7  |
|          |        | 337.1346   | -1.9 | -5.6 | -1.5 | 2033.8 | 1.981 | 13.79    | C10 H25 O12 |

**Figure S15.** The HR-ESI-MS of compound **3**.

ZYA 8-4 DMSO 1mg H

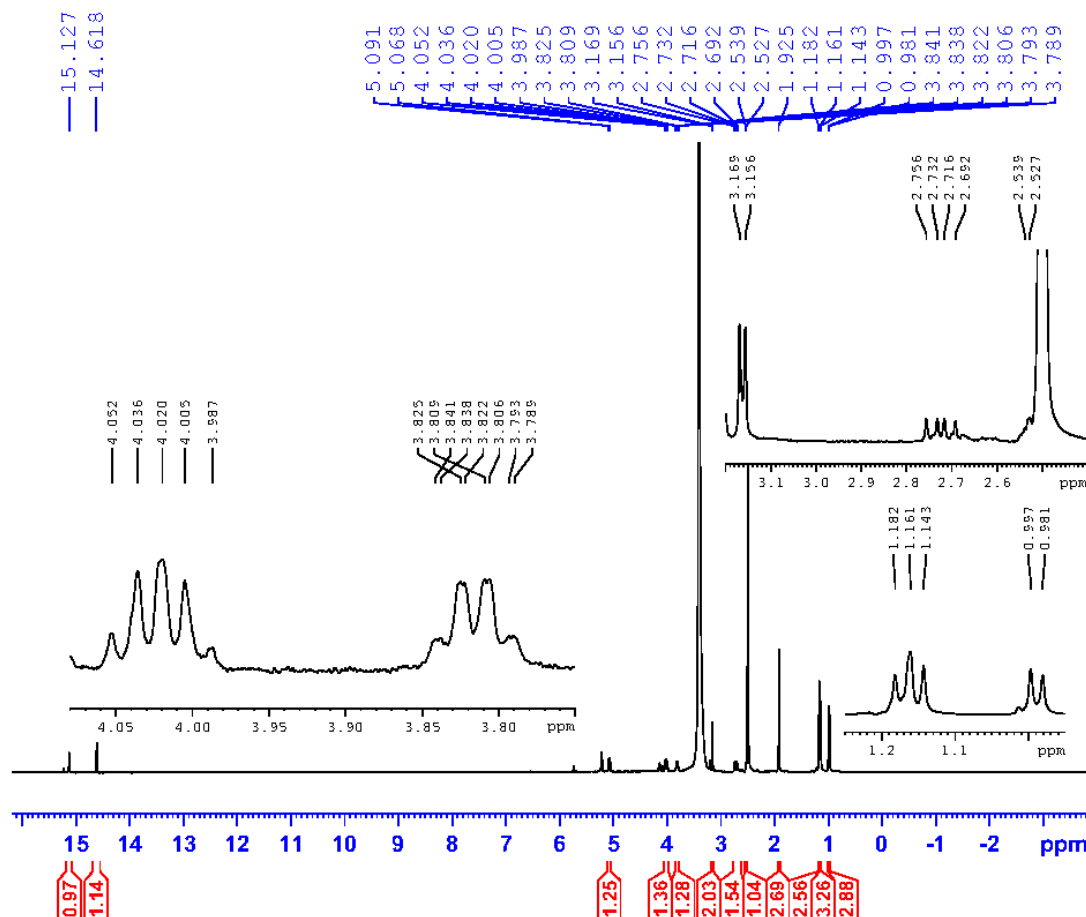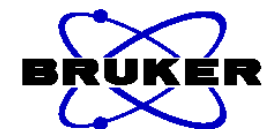

NAME ZYA 8-4 DMSO 1mg  
EXPNO 1  
PROCNO 1  
Date\_ 20220508  
Time\_ 22.03  
INSTRUM spect  
PROBHD 5 mm PABBO BB-  
PULPROG zg30  
TD 65536  
SOLVENT DMSO  
NS 19  
DS 2  
SWH 8012.820 Hz  
FIDRES 0.122266 Hz  
AQ 4.0894966 sec  
RG 161  
DW 62.400 usec  
DE 6.50 usec  
TE 296.7 K  
D1 1.00000000 sec  
TD0 1

===== CHANNEL f1 =====  
SF01 400.1324710 MHz  
NUC1 1H  
P1 13.90 usec  
SI 32768  
SF 400.1300034 MHz  
WDW EM  
SSB 0  
LB 0.30 Hz  
GB 0  
PC 1.00

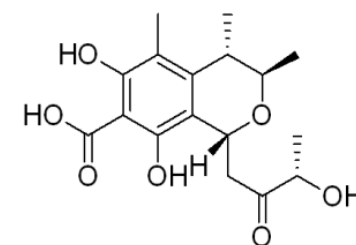

Figure S16. The  $^1\text{H}$  NMR spectrum of compound **3** in  $\text{DMSO}-d_6$ .

ZYA 8-4 DMSO 1mg C

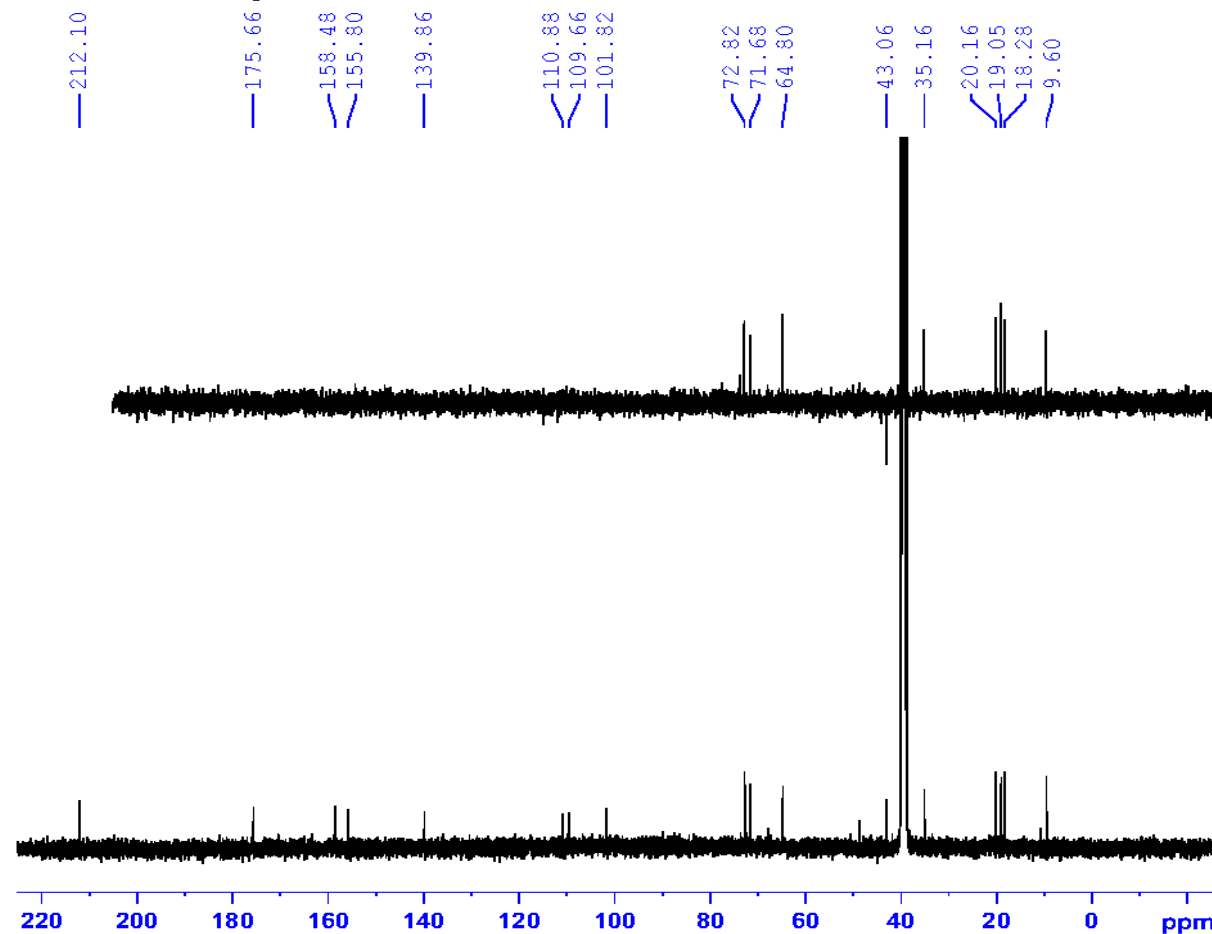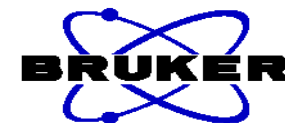

NAME ZYA 8-4 DMSO 1mg  
EXPNO 2  
PROCNO 1  
Date\_ 20220511  
Time\_ 22.16  
INSTRUM spect  
PROBHD 5 mm PABBO BB-  
PULPROG zgpg30  
TD 65536  
SOLVENT DMSO  
NS 10240  
DS 4  
SWH 25252.525 Hz  
FIDRES 0.385323 Hz  
AQ 1.2976629 sec  
RG 203  
DW 19.800 usec  
DE 6.50 usec  
TE 296.9 K  
D1 2.00000000 sec  
D11 0.03000000 sec  
TD0 1

===== CHANNEL f1 =====  
SF01 100.6228298 MHz  
NUC1 13C  
P1 12.37 usec  
SI 32768  
SF 100.6128091 MHz  
WDW EM  
SSB 0  
LB 1.00 Hz  
GB 0  
PC 1.40

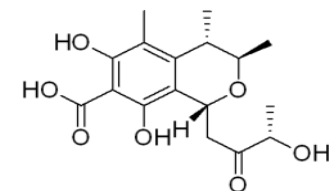

Figure S17. The  $^{13}\text{C}$  NMR spectrum of compound **3** in  $\text{DMSO-}d_6$ .

CC1=C(C(=C(C=C1)O)C(=O)O)O[C@H]2C[C@@H](C[C@H](O)C(=O)O)[C@H](O)[C@H]2O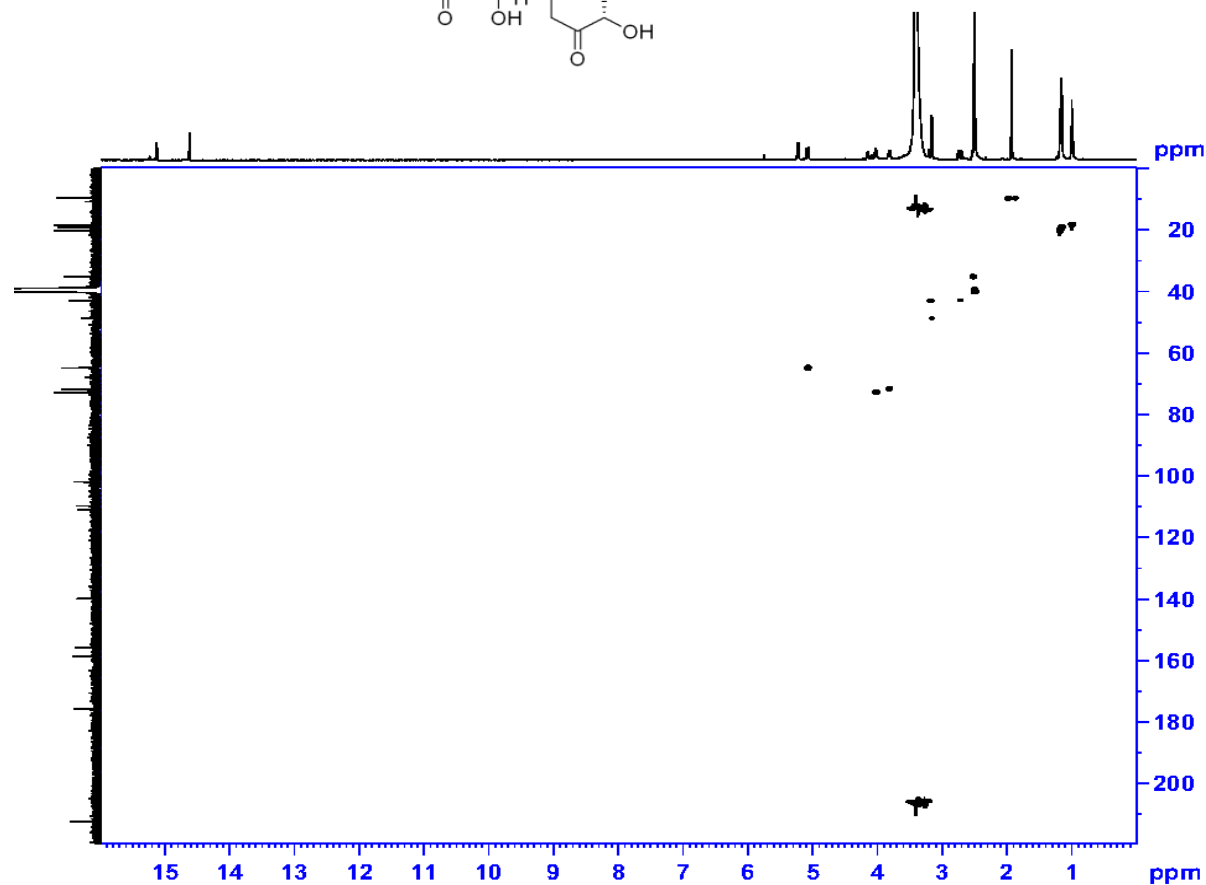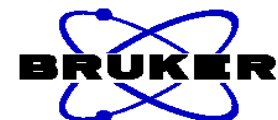

| NAME    | ZYA 8-4        | DMSO   | Img   |
|---------|----------------|--------|-------|
| EXPNO   |                |        | 4     |
| PROCNO  |                |        | 1     |
| Date_   | 20220703       |        |       |
| Time    |                |        | 11.24 |
| INSTRUM |                | spect  |       |
| PROBHD  | 5 mm PABBO BB- |        |       |
| PULPROG | hsqcetgps1     | s2.2   |       |
| TD      |                | 1024   |       |
| SOLVENT |                | DMSO   |       |
| NS      |                | 16     |       |
| DS      |                | 32     |       |
| SWH     | 8012.820       | Hz     |       |
| FIDRES  | 7.825020       | Hz     |       |
| AQ      | 0.0639476      | sec    |       |
| RG      |                | 203    |       |
| DW      |                | 62.400 | usec  |
| DE      |                | 6.50   | usec  |
| TE      |                | 296.7  | K     |
| CNST2   | 145.0000000    |        |       |
| CNST17  | -0.5000000     |        |       |
| D0      | 0.00000300     | sec    |       |
| D1      | 2.00000000     | sec    |       |
| D4      | 0.0172414      | sec    |       |
| D11     | 0.03000000     | sec    |       |
| D16     | 0.00200000     | sec    |       |
| D24     | 0.00089000     | sec    |       |
| INO     | 0.00002260     | sec    |       |

```

----- CHANNEL f1 -----
SFOL      400.1340013 MHz
NUCL1      1H
P1         13.90 used
P2         27.80 used
P28        1000.00 used
ND0        2
TD         256
SFOL      100.6238 MHz
FIDRES     86.421463 Hz
SW         219.867 ppm
FnMODE     Echo-Antiecho
SI         1024
SF         400.1300035 MHz
WDW        QSiNE
SSB        2
LB         0.00 Hz
GB         0
PC         1.40
SI         1024
MC2        echo-antiecho
SF         100.612800 MHz
WDW        QSiNE
SSB        2
LB         0.00 Hz
GB         0

```

**Figure S18.** The HSQC spectrum of compound **3** in DMSO-*d*<sub>6</sub>.

ZYA 8-4 DMSO 1mg COSY

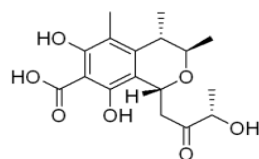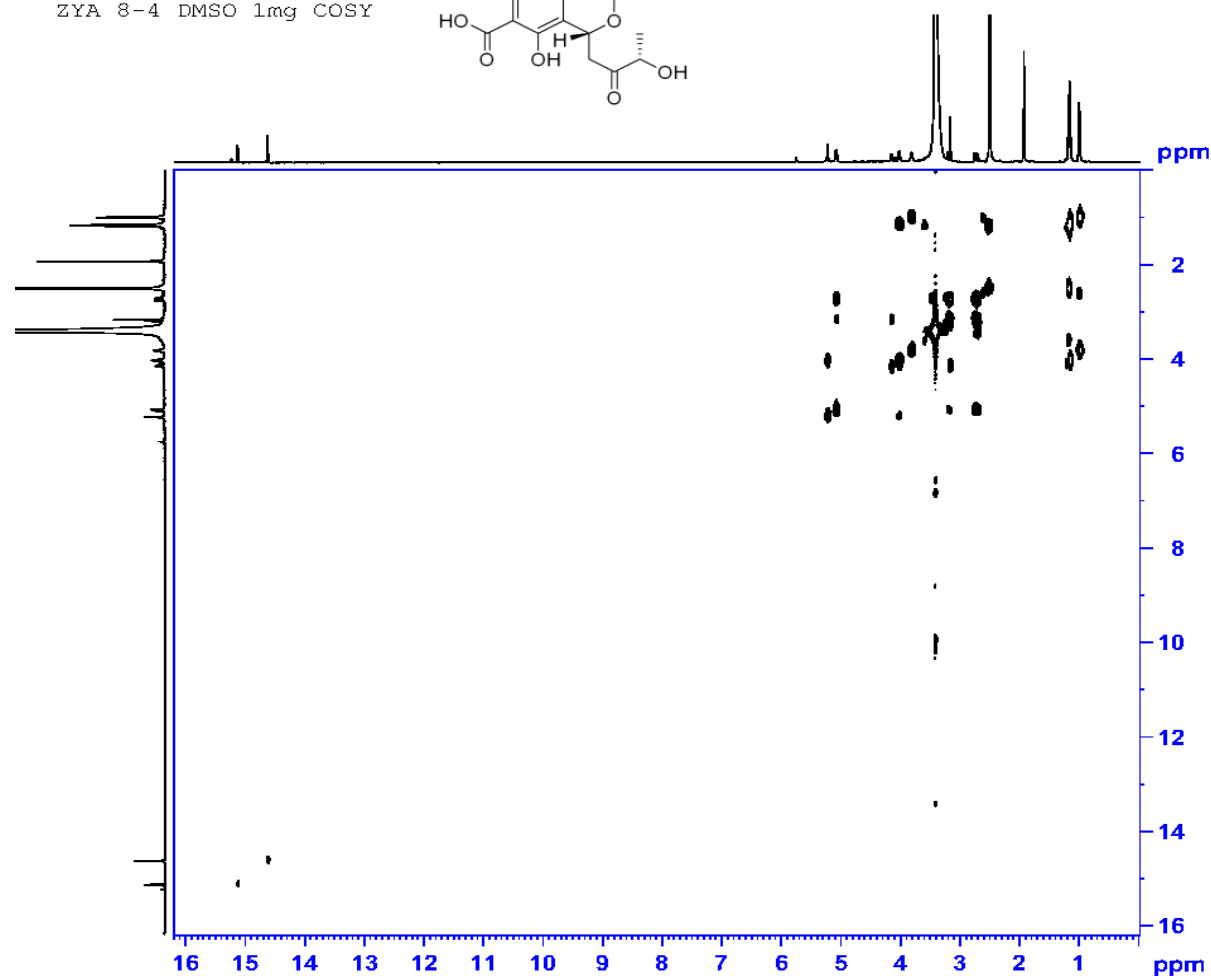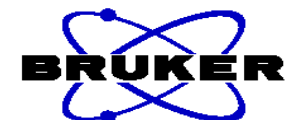

NAME ZYA 8-4 DMSO 1mg  
EXPNO 5  
PROCNO 1  
Date\_ 20220703  
Time 13.49  
INSTRUM spect  
PROBHD 5 mm PABBO BB-  
PULPROG cosygpmfzf  
TD 2048  
SOLVENT DMSO  
NS 64  
DS 8  
SWH 8012.820 Hz  
FIDRES 3.912510 Hz  
AQ 0.1278452 sec  
RG 203  
DW 62.400 usec  
DE 6.50 usec  
TE 296.7 K  
D0 0.00000300 sec  
D1 2.00000000 sec  
D13 0.00000400 sec  
D16 0.00020000 sec  
IN0 0.00012500 sec

===== CHANNEL f1 =====  
SFO1 400.1340013 MHz  
NUC1 1H  
P1 13.90 usec  
ND0 1  
TD 128  
SFO1 400.134 MHz  
FIDRES 62.500000 Hz  
SW 19.993 ppm  
FMODE QF  
SI 1024  
SF 400.1300035 MHz  
WDW SINE  
SSB 0  
LB 0.00 Hz  
GB 0  
PC 1.40  
SI 1024  
MC2 QF  
SF 400.1300035 MHz  
WDW SINE  
SSB 0  
LB 0.00 Hz  
GB 0

Figure S19. The  $^1\text{H}$ - $^1\text{H}$  COSY spectrum of compound **3** in  $\text{DMSO-}d_6$ .

ZYA 8-4 DMSO 1mg BC

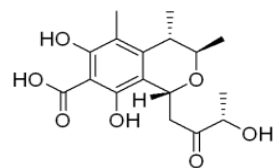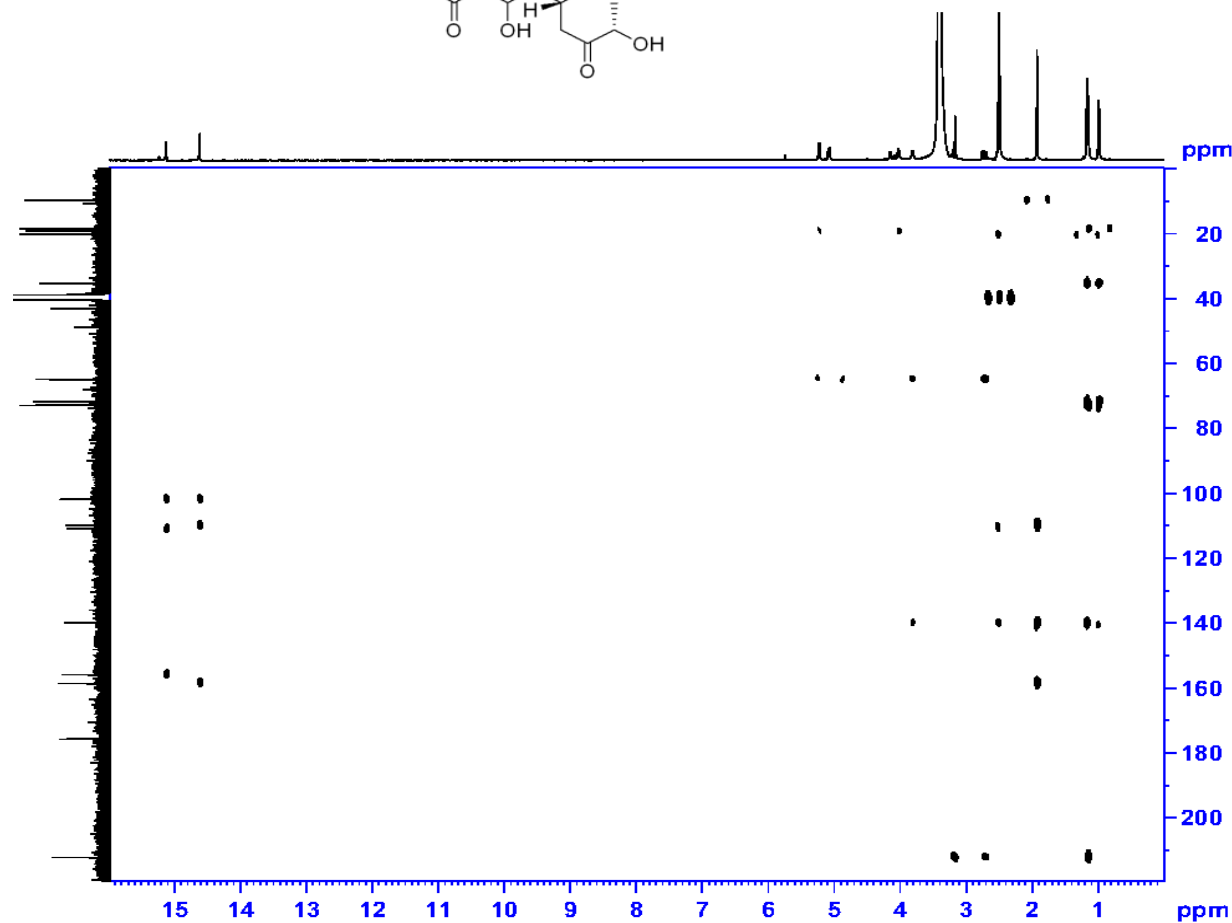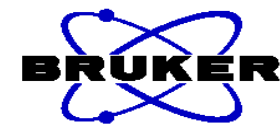

NAME ZYA 8-4 DMSO 1mg  
 EXPNO 6  
 PROCNO 1  
 Date\_ 20220703  
 Time\_ 18.42  
 INSTRUM spect  
 PROBHD 5 mm PABBO BB-  
 PULPROG hmbcgpndqf  
 TD 4096  
 SOLVENT DMSO  
 NS 64  
 DS 16  
 SWH 8012.820 Hz  
 FIDRES 1.956255 Hz  
 AQ 0.2556404 sec  
 RG 203  
 DW 62.400 usec  
 DE 6.50 usec  
 TE 296.6 K  
 CNST13 8.0000000  
 D0 0.00000300 sec  
 D1 1.50000000 sec  
 D6 0.06250000 sec  
 D16 0.00020000 sec  
 IN0 0.00002260 sec

===== CHANNEL f1 =====  
 SF01 400.1340013 MHz  
 NUC1 1H  
 P1 13.90 usec  
 P2 27.80 usec  
 ND0 2  
 TD 128  
 SF01 100.6238 MHz  
 FIDRES 172.842926 Hz  
 SW 219.867 ppm  
 FMODE QF  
 SI 1024  
 SF 400.1300035 MHz  
 WDW SINE  
 SSB 0  
 LB 0.00 Hz  
 GB 0  
 PC 1.40  
 SI 1024  
 MC2 QF  
 SF 100.6128090 MHz  
 WDW SINE  
 SSB 0  
 LB 0.00 Hz  
 GB 0

Figure S20. The HMBC spectrum of compound **3** in DMSO-*d*<sub>6</sub>.

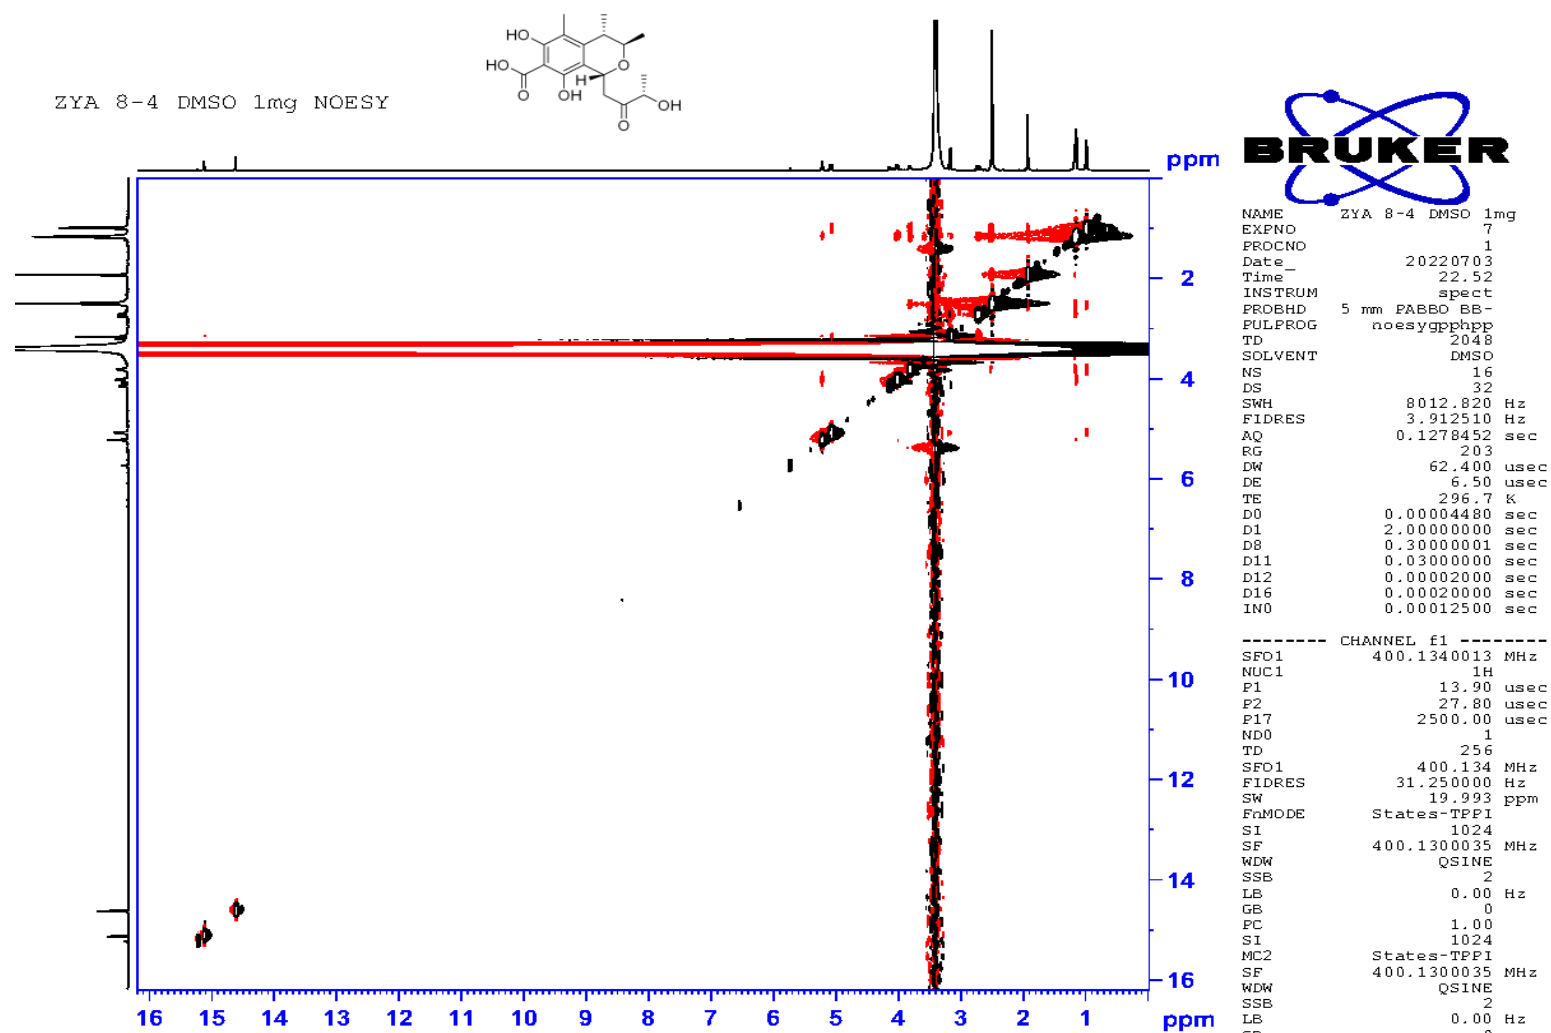

Figure S21. The NOESY spectrum of compound 3 in DMSO- $d_6$ .
